# Supplementary material
Source: publisher figshare collection journal article supplement (https://gsajournals.figshare.com/ndownloader/files/24538853)
Supplement: Supplementary file 1 [file 24538853]

## Sheet: K14+K19_comparison
Comparison of predicted genes from chromosomes 9 and 14 with manually corrected genes (504 loci)
	Pipeline and filters without manual correction
	R265 annotation filtered¹			Farrer et al 2015		Ferrareze et al., 2017
Predicted loci	550			513		507
Predicted transcripts	567			514		507
Multi-exon transcripts	528			482		494
Multi-transcripts loci	16			1		0
Predicted exons	3135			2861		3136
Predicted introns	2572			2347		2629
Missed exons	147/3135	4.7%		424/3135	13.5%	179/3135	5.7%
Novel exons	135/3135	4.3%		142/2861	5.0%	182/3136	5.8%
Missed introns	153/2631	5.8%		327/2631	12.4%	131/2631	5.0%
Novel introns	100/2572	3.9%		135/2347	5.8%	166/2629	6.3%
Missed loci	13/504	2.6%		20/504	4.0%	19/504	3.8%
Novel loci	35/550	6.4%		22/513	4.3%	21/507	4.1%
Rightly predicted loci	377			219		322
Rightly predicted loci in all predicted loci	377/550	68.5%		219/513	42.7%	322/507	63.5%
Rightly predicted loci of all R265 chrom 9 and 14 (504)	377/504	74.8%		219/504	43.5%	322/504	63.9%
Rightly predicted loci of overlaped R265 reference loci	377/491	76.8%		219/484	45.2%	322/485	66.4%
Quality index		0.512			0.186		0.406
Only about the overlapped loci
Number of predicted loci that overlap reference	515			491		486
Loci from reference that were overlaped	491			484		485
Predicted exons that overlap reference loci	3031			2787		3058
Predicted introns that overlap reference loci	2503			2295		2572
Number of exons in reference overlaped loci	3090			3047		3046
Number of introns in reference overlaped loci	2599			2563		2561
Missed exons	102/3090	3.3%		336/3047	11.0%	90/3046	3.0%
Novel exons	31/3031	1.0%		68/2787	2.4%	104/3058	3.4%
Missed introns	121/2599	4.7%		259/2563	10.1%	61/2561	2.4%
Novel introns	31/2503	1.2%		83/2295	3.6%	109/2572	4.2%

## Sheet: Merged_genes
MERGED GENES (corrected)
CNBG_0346	-	CNBG_0346	CNBG_0345
CNBG_0400	-	CNBG_0400	CNBG_0399
CNBG_0545	-	CNBG_0545	CNBG_0546
CNBG_0787	-	CNBG_0787	CNBG_0788
CNBG_0920	-	CNBG_0920	CNBG_0921
CNBG_1628	-	CNBG_1628	CNBG_1627
CNBG_1754	-	CNBG_1755	CNBG_1754
CNBG_1763	-	CNBG_1764	CNBG_1763
CNBG_1977	-	CNBG_1978	CNBG_1977
CNBG_2148	-	CNBG_2149	CNBG_2148
CNBG_2174	-	CNBG_2175	CNBG_2174
CNBG_2185	-	CNBG_2186	CNBG_2185
CNBG_2584	-	CNBG_2585	CNBG_2584
CNBG_2673	-	CNBG_2674	CNBG_2673	CNBG_2672
CNBG_2832	-	CNBG_2832	CNBG_2831
CNBG_2951		CNBG_9311	CNBG_2951
CNBG_3021	-	CNBG_9320	CNBG_3021
CNBG_3054	-	CNBG_3054	CNBG_3055
CNBG_3123	-	CNBG_3123	CNBG_3124
CNBG_3156	-	CNBG_3155	CNBG_3156
CNBG_3173	-	CNBG_3173	CNBG_3174
CNBG_3179	-	CNBG_3179	CNBG_9336
CNBG_3461	-	CNBG_3461	CNBG_3462
CNBG_3553	-	CNBG_3552	CNBG_3553
CNBG_3637	-	CNBG_3636	CNBG_3637
CNBG_3916	-	CNBG_9445	CNBG_3916
CNBG_4086	-	CNBG_4086	CNBG_4087
CNBG_4098	-	CNBG_4098	CNBG_4097
CNBG_4448	-	CNBG_4448	CNBG_4447
CNBG_4457	-	CNBG_4457	CNBG_4456
CNBG_4755	-	CNBG_4755	CNBG_4754
CNBG_4774	-	CNBG_9519	CNBG_4774
CNBG_4820	-	CNBG_4821	CNBG_4820
CNBG_5018	-	CNBG_5017	CNBG_5018
CNBG_5067	-	CNBG_9557	CNBG_5067
CNBG_5184	-	CNBG_5184	CNBG_5185
CNBG_5651	-	CNBG_5651	CNBG_9609
CNBG_5729	-	CNBG_5729	CNBG_5730	CNBG_5731
CNBG_5917	-	CNBG_5918	CNBG_5917
CNBG_5935	-	CNBG_5935	CNBG_5936
CNBG_6041	-	CNBG_6042	CNBG_6041
CNBG_6052	-	CNBG_6053	CNBG_6052
CNBG_9005	-	CNBG_9006	CNBG_9005
CNBG_9015	-	CNBG_9016	CNBG_9015
CNBG_9029	-	CNBG_9030	CNBG_9029
CNBG_9038	-	CNBG_9038	CNBG_9037
CNBG_9072	-	CNBG_9071	CNBG_9072
CNBG_9116	-	CNBG_9116	CNBG_9117
CNBG_9144	-	CNBG_9143	CNBG_9144
CNBG_9146	-	CNBG_9145	CNBG_9146
CNBG_9161	-	CNBG_9161	CNBG_9160
CNBG_9192	-	CNBG_1917	CNBG_9192
CNBG_9211	-	CNBG_9211	CNBG_9210
CNBG_9221	-	CNBG_9221	CNBG_9220
CNBG_9229	-	CNBG_9229	CNBG_9228
CNBG_9293	-	CNBG_9293	CNBG_9292
CNBG_9305	-	CNBG_9306	CNBG_9305
CNBG_9328	-	CNBG_9328	CNBG_9327
CNBG_9343	-	CNBG_9342	CNBG_9343
CNBG_9369	-	CNBG_9368	CNBG_9369
CNBG_9375	-	CNBG_9375	CNBG_3557
CNBG_9386	-	CNBG_9386	CNBG_9387
CNBG_9389	-	CNBG_3658	CNBG_9388	CNBG_9389
CNBG_9394	-	CNBG_9393	CNBG_9394
CNBG_9421	-	CNBG_9421	CNBG_9420
CNBG_9434	-	CNBG_9435	CNBG_9434
CNBG_9450	-	CNBG_9450	CNBG_9674
CNBG_9523	-	CNBG_9524	CNBG_9523
CNBG_9527	-	CNBG_9527	CNBG_9526
CNBG_9542	-	CNBG_9542	CNBG_9541
CNBG_9583	-	CNBG_9583	CNBG_9584
CNBG_9647	-	CNBG_9646	CNBG_9647
CNBG_9662	-	CNBG_9662	CNBG_9661
CNBG_9669	-	CNBG_9670	CNBG_9669

## Sheet: Non_predicted
NON PREDICTED/ NON ANNOTATED GENES
CNBG_0105
CNBG_0171
CNBG_0306
CNBG_0613
CNBG_06215
CNBG_0725
CNBG_0845
CNBG_0962
CNBG_1136
CNBG_1153
CNBG_1369
CNBG_1578
CNBG_1611
CNBG_1867
CNBG_1908
CNBG_1985
CNBG_1989
CNBG_2024
CNBG_2035
CNBG_2111
CNBG_2145
CNBG_2202
CNBG_2256
CNBG_2339
CNBG_2365
CNBG_2421
CNBG_2466
CNBG_2467
CNBG_2677
CNBG_2679
CNBG_2715
CNBG_2905
CNBG_2913
CNBG_2955
CNBG_2969
CNBG_2982
CNBG_3161
CNBG_3402
CNBG_3505
CNBG_3514
CNBG_3710
CNBG_3742
CNBG_3784
CNBG_3821
CNBG_3902
CNBG_4060
CNBG_4167
CNBG_4314
CNBG_4395
CNBG_4480
CNBG_4536
CNBG_4627
CNBG_4833
CNBG_4906
CNBG_4934
CNBG_4955
CNBG_4962
CNBG_5062
CNBG_5218
CNBG_5219
CNBG_5382
CNBG_5424
CNBG_5451
CNBG_5490
CNBG_5505
CNBG_5607
CNBG_5816
CNBG_5818
CNBG_5890
CNBG_5909
CNBG_5945
CNBG_6024
CNBG_6191
CNBG_9083
CNBG_9093
CNBG_9100
CNBG_9110
CNBG_9125
CNBG_9157
CNBG_9170
CNBG_9204
CNBG_9233
CNBG_9242
CNBG_9265
CNBG_9266
CNBG_9278
CNBG_9284
CNBG_9309
CNBG_9315
CNBG_9321
CNBG_9338
CNBG_9355
CNBG_9359
CNBG_9410
CNBG_9446
CNBG_9452
CNBG_9475
CNBG_9478
CNBG_9499
CNBG_9518
CNBG_9525
CNBG_9545
CNBG_9558
CNBG_9563
CNBG_9564
CNBG_9622
CNBG_9635
CNBG_9650
CNBG_9652
CNBG_9653
CNBG_9663
CNBG_9678
CNBG_9679

## Sheet: annotated_genes
ANNOTATED CODING GENES
CNBG_0001
CNBG_0002
CNBG_0003
CNBG_0004
CNBG_0005
CNBG_0008
CNBG_0009
CNBG_0010
CNBG_0011
CNBG_0012
CNBG_0013
CNBG_0014
CNBG_0015
CNBG_0016
CNBG_0017
CNBG_0018
CNBG_0019
CNBG_0021
CNBG_0022
CNBG_0023
CNBG_0024
CNBG_0025
CNBG_0026
CNBG_0027
CNBG_0028
CNBG_0029
CNBG_0030
CNBG_0031
CNBG_0033
CNBG_0034
CNBG_0035
CNBG_0036
CNBG_0037
CNBG_0038
CNBG_0039
CNBG_0040
CNBG_0041
CNBG_0042
CNBG_0043
CNBG_0044
CNBG_0045
CNBG_0046
CNBG_0047
CNBG_0048
CNBG_0049
CNBG_0050
CNBG_0051
CNBG_0052
CNBG_0053
CNBG_0054
CNBG_0055
CNBG_0056
CNBG_0057
CNBG_0058
CNBG_0059
CNBG_0061
CNBG_0062
CNBG_0063
CNBG_0064
CNBG_0065
CNBG_0066
CNBG_0067
CNBG_0068
CNBG_0069
CNBG_0070
CNBG_0071
CNBG_0072
CNBG_0073
CNBG_0074
CNBG_0075
CNBG_0076
CNBG_0077
CNBG_0078
CNBG_0079
CNBG_0080
CNBG_0081
CNBG_0082
CNBG_0083
CNBG_0084
CNBG_0085
CNBG_0086
CNBG_0087
CNBG_0088
CNBG_0089
CNBG_0090
CNBG_0091
CNBG_0092
CNBG_0093
CNBG_0094
CNBG_0095
CNBG_0096
CNBG_0097
CNBG_0098
CNBG_0099
CNBG_0100
CNBG_0101
CNBG_0102
CNBG_0103
CNBG_0104
CNBG_0106
CNBG_0107
CNBG_0108
CNBG_0109
CNBG_0110
CNBG_0111
CNBG_0112
CNBG_0113
CNBG_0115
CNBG_0116
CNBG_0117
CNBG_0118
CNBG_0119
CNBG_0120
CNBG_0121
CNBG_0122
CNBG_0123
CNBG_0124
CNBG_0125
CNBG_0126
CNBG_0127
CNBG_0128
CNBG_0129
CNBG_0130
CNBG_0131
CNBG_0132
CNBG_0133
CNBG_0134
CNBG_0135
CNBG_0136
CNBG_0137
CNBG_0138
CNBG_0140
CNBG_0141
CNBG_0142
CNBG_0143
CNBG_0144
CNBG_0145
CNBG_0146
CNBG_0147
CNBG_0148
CNBG_0149
CNBG_0151
CNBG_0152
CNBG_0153
CNBG_0154
CNBG_0155
CNBG_0156
CNBG_0157
CNBG_0158
CNBG_0159
CNBG_0160
CNBG_0161
CNBG_0162
CNBG_0163
CNBG_0164
CNBG_0165
CNBG_0166
CNBG_0167
CNBG_0168
CNBG_0169
CNBG_0170
CNBG_0172
CNBG_0174
CNBG_0175
CNBG_0176
CNBG_0177
CNBG_0178
CNBG_0179
CNBG_0180
CNBG_0181
CNBG_0182
CNBG_0183
CNBG_0184
CNBG_0185
CNBG_0186
CNBG_0187
CNBG_0188
CNBG_0189
CNBG_0190
CNBG_0191
CNBG_0192
CNBG_0193
CNBG_0194
CNBG_0195
CNBG_0196
CNBG_0197
CNBG_0198
CNBG_0199
CNBG_0200
CNBG_0201
CNBG_0203
CNBG_0204
CNBG_0205
CNBG_0206
CNBG_0207
CNBG_0208
CNBG_0209
CNBG_0210
CNBG_0211
CNBG_0212
CNBG_0213
CNBG_0214
CNBG_0215
CNBG_0216
CNBG_0217
CNBG_0218
CNBG_0219
CNBG_0220
CNBG_0221
CNBG_0222
CNBG_0223
CNBG_0224
CNBG_0225
CNBG_0226
CNBG_0227
CNBG_0228
CNBG_0229
CNBG_0230
CNBG_0231
CNBG_0232
CNBG_0233
CNBG_0234
CNBG_0235
CNBG_0236
CNBG_0237
CNBG_0238
CNBG_0239
CNBG_0240
CNBG_0241
CNBG_0242
CNBG_0243
CNBG_0244
CNBG_0245
CNBG_0246
CNBG_0247
CNBG_0249
CNBG_0250
CNBG_0251
CNBG_0252
CNBG_0253
CNBG_0254
CNBG_0255
CNBG_0256
CNBG_0257
CNBG_0258
CNBG_0259
CNBG_0260
CNBG_0261
CNBG_0262
CNBG_0263
CNBG_0265
CNBG_0266
CNBG_0267
CNBG_0268
CNBG_0269
CNBG_0270
CNBG_0271
CNBG_0272
CNBG_0273
CNBG_0274
CNBG_0275
CNBG_0276
CNBG_0277
CNBG_0278
CNBG_0279
CNBG_0280
CNBG_0281
CNBG_0282
CNBG_0283
CNBG_0284
CNBG_0285
CNBG_0286
CNBG_0287
CNBG_0288
CNBG_0289
CNBG_0290
CNBG_0291
CNBG_0292
CNBG_0293
CNBG_0294
CNBG_0295
CNBG_0296
CNBG_0297
CNBG_0298
CNBG_0299
CNBG_0300
CNBG_0301
CNBG_0302
CNBG_0303
CNBG_0304
CNBG_0307
CNBG_0308
CNBG_0309
CNBG_0310
CNBG_0311
CNBG_0312
CNBG_0313
CNBG_0314
CNBG_0315
CNBG_0316
CNBG_0317
CNBG_0318
CNBG_0319
CNBG_0320
CNBG_0321
CNBG_0322
CNBG_0323
CNBG_0324
CNBG_0325
CNBG_0326
CNBG_0327
CNBG_0328
CNBG_0329
CNBG_0330
CNBG_0331
CNBG_0332
CNBG_0333
CNBG_0334
CNBG_0335
CNBG_0336
CNBG_0337
CNBG_0338
CNBG_0339
CNBG_0340
CNBG_0341
CNBG_0342
CNBG_0343
CNBG_0344
CNBG_0346
CNBG_0347
CNBG_0348
CNBG_0350
CNBG_0351
CNBG_0352
CNBG_0353
CNBG_0354
CNBG_0355
CNBG_0356
CNBG_0357
CNBG_0358
CNBG_0359
CNBG_0360
CNBG_0361
CNBG_0362
CNBG_0363
CNBG_0364
CNBG_0365
CNBG_0366
CNBG_0367
CNBG_0368
CNBG_0369
CNBG_0370
CNBG_0371
CNBG_0372
CNBG_0373
CNBG_0374
CNBG_0375
CNBG_0376
CNBG_0377
CNBG_0378
CNBG_0379
CNBG_0380
CNBG_0381
CNBG_0382
CNBG_0383
CNBG_0384
CNBG_0385
CNBG_0386
CNBG_0387
CNBG_0388
CNBG_0389
CNBG_0390
CNBG_0391
CNBG_0392
CNBG_0393
CNBG_0394
CNBG_0395
CNBG_0396
CNBG_0397
CNBG_0398
CNBG_0400
CNBG_0401
CNBG_0402
CNBG_0403
CNBG_0404
CNBG_0405
CNBG_0406
CNBG_0407
CNBG_0408
CNBG_0409
CNBG_0410
CNBG_0411
CNBG_0412
CNBG_0413
CNBG_0414
CNBG_0415
CNBG_0416
CNBG_0417
CNBG_0418
CNBG_0419
CNBG_0420
CNBG_0421
CNBG_0422
CNBG_0423
CNBG_0424
CNBG_0425
CNBG_0426
CNBG_0427
CNBG_0428
CNBG_0430
CNBG_0431
CNBG_0432
CNBG_0433
CNBG_0434
CNBG_0435
CNBG_0436
CNBG_0437
CNBG_0438
CNBG_0439
CNBG_0440
CNBG_0441
CNBG_0442
CNBG_0443
CNBG_0444
CNBG_0445
CNBG_0446
CNBG_0447
CNBG_0448
CNBG_0449
CNBG_0450
CNBG_0451
CNBG_0452
CNBG_0453
CNBG_0454
CNBG_0455
CNBG_0456
CNBG_0457
CNBG_0458
CNBG_0459
CNBG_0460
CNBG_0461
CNBG_0462
CNBG_0463
CNBG_0464
CNBG_0465
CNBG_0466
CNBG_0467
CNBG_0468
CNBG_0469
CNBG_0470
CNBG_0471
CNBG_0472
CNBG_0473
CNBG_0474
CNBG_0475
CNBG_0476
CNBG_0477
CNBG_0478
CNBG_0479
CNBG_0480
CNBG_0481
CNBG_0482
CNBG_0483
CNBG_0484
CNBG_0485
CNBG_0486
CNBG_0487
CNBG_0489
CNBG_0490
CNBG_0491
CNBG_0492
CNBG_0493
CNBG_0494
CNBG_0495
CNBG_0496
CNBG_0497
CNBG_0498
CNBG_0499
CNBG_0500
CNBG_0501
CNBG_0502
CNBG_0503
CNBG_0504
CNBG_0505
CNBG_0506
CNBG_0507
CNBG_0508
CNBG_0509
CNBG_0510
CNBG_0511
CNBG_0512
CNBG_0513
CNBG_0514
CNBG_0515
CNBG_0516
CNBG_0517
CNBG_0518
CNBG_0519
CNBG_0520
CNBG_0521
CNBG_0522
CNBG_0523
CNBG_0524
CNBG_0525
CNBG_0526
CNBG_0527
CNBG_0528
CNBG_0529
CNBG_0530
CNBG_0531
CNBG_0532
CNBG_0533
CNBG_0534
CNBG_0535
CNBG_0536
CNBG_0537
CNBG_0538
CNBG_0540
CNBG_0541
CNBG_0542
CNBG_0543
CNBG_0544
CNBG_0545
CNBG_0547
CNBG_0548
CNBG_0549
CNBG_0550
CNBG_0551
CNBG_0552
CNBG_0553
CNBG_0554
CNBG_0555
CNBG_0556
CNBG_0557
CNBG_0558
CNBG_0559
CNBG_0560
CNBG_0561
CNBG_0562
CNBG_0563
CNBG_0564
CNBG_0565
CNBG_0566
CNBG_0567
CNBG_0568
CNBG_0569
CNBG_0570
CNBG_0571
CNBG_0572
CNBG_0573
CNBG_0574
CNBG_0575
CNBG_0576
CNBG_0577
CNBG_0578
CNBG_0579
CNBG_0580
CNBG_0581
CNBG_0582
CNBG_0583
CNBG_0584
CNBG_0585
CNBG_0586
CNBG_0587
CNBG_0588
CNBG_0589
CNBG_0590
CNBG_0591
CNBG_0592
CNBG_0593
CNBG_0594
CNBG_0595
CNBG_0596
CNBG_0597
CNBG_0598
CNBG_0599
CNBG_0600
CNBG_0601
CNBG_0602
CNBG_0603
CNBG_0604
CNBG_0605
CNBG_0606
CNBG_0607
CNBG_0608
CNBG_0609
CNBG_0610
CNBG_0611
CNBG_0612
CNBG_0614
CNBG_0615
CNBG_0616
CNBG_0617
CNBG_0618
CNBG_0619
CNBG_0620
CNBG_0621
CNBG_0622
CNBG_0623
CNBG_0624
CNBG_0625
CNBG_0626
CNBG_0627
CNBG_0628
CNBG_0629
CNBG_0630
CNBG_0631
CNBG_0633
CNBG_0634
CNBG_0635
CNBG_0636
CNBG_0637
CNBG_0638
CNBG_0639
CNBG_0640
CNBG_0641
CNBG_0642
CNBG_0643
CNBG_0644
CNBG_0645
CNBG_0646
CNBG_0647
CNBG_0648
CNBG_0649
CNBG_0650
CNBG_0651
CNBG_0652
CNBG_0654
CNBG_0655
CNBG_0656
CNBG_0657
CNBG_0658
CNBG_0659
CNBG_0660
CNBG_0661
CNBG_0662
CNBG_0663
CNBG_0664
CNBG_0665
CNBG_0666
CNBG_0667
CNBG_0668
CNBG_0670
CNBG_0671
CNBG_0672
CNBG_0673
CNBG_0674
CNBG_0676
CNBG_0677
CNBG_0678
CNBG_0679
CNBG_0680
CNBG_0682
CNBG_0683
CNBG_0685
CNBG_0687
CNBG_0689
CNBG_0690
CNBG_0691
CNBG_0692
CNBG_0694
CNBG_0695
CNBG_0696
CNBG_0697
CNBG_0698
CNBG_0699
CNBG_0700
CNBG_0701
CNBG_0702
CNBG_0703
CNBG_0704
CNBG_0705
CNBG_0706
CNBG_0707
CNBG_0708
CNBG_0709
CNBG_0710
CNBG_0711
CNBG_0712
CNBG_0713
CNBG_0714
CNBG_0715
CNBG_0716
CNBG_0717
CNBG_0718
CNBG_0719
CNBG_0720
CNBG_0721
CNBG_0722
CNBG_0723
CNBG_0724
CNBG_0726
CNBG_0727
CNBG_0728
CNBG_0729
CNBG_0730
CNBG_0731
CNBG_0732
CNBG_0733
CNBG_0734
CNBG_0735
CNBG_0736
CNBG_0737
CNBG_0738
CNBG_0739
CNBG_0740
CNBG_0741
CNBG_0742
CNBG_0743
CNBG_0744
CNBG_0745
CNBG_0746
CNBG_0747
CNBG_0748
CNBG_0749
CNBG_0750
CNBG_0751
CNBG_0753
CNBG_0755
CNBG_0756
CNBG_0757
CNBG_0758
CNBG_0759
CNBG_0760
CNBG_0761
CNBG_0762
CNBG_0763
CNBG_0764
CNBG_0765
CNBG_0766
CNBG_0767
CNBG_0768
CNBG_0769
CNBG_0770
CNBG_0771
CNBG_0772
CNBG_0773
CNBG_0774
CNBG_0775
CNBG_0776
CNBG_0777
CNBG_0778
CNBG_0780
CNBG_0781
CNBG_0782
CNBG_0783
CNBG_0784
CNBG_0785
CNBG_0786
CNBG_0787
CNBG_0789
CNBG_0790
CNBG_0791
CNBG_0792
CNBG_0793
CNBG_0794
CNBG_0795
CNBG_0796
CNBG_0798
CNBG_0799
CNBG_0800
CNBG_0801
CNBG_0803
CNBG_0804
CNBG_0805
CNBG_0806
CNBG_0807
CNBG_0808
CNBG_0809
CNBG_0810
CNBG_0811
CNBG_0812
CNBG_0813
CNBG_0814
CNBG_0815
CNBG_0816
CNBG_0817
CNBG_0818
CNBG_0819
CNBG_0820
CNBG_0821
CNBG_0822
CNBG_0823
CNBG_0824
CNBG_0825
CNBG_0826
CNBG_0827
CNBG_0828
CNBG_0829
CNBG_0830
CNBG_0831
CNBG_0832
CNBG_0833
CNBG_0834
CNBG_0835
CNBG_0836
CNBG_0837
CNBG_0838
CNBG_0839
CNBG_0840
CNBG_0841
CNBG_0842
CNBG_0843
CNBG_0844
CNBG_0846
CNBG_0848
CNBG_0849
CNBG_0850
CNBG_0851
CNBG_0852
CNBG_0853
CNBG_0854
CNBG_0855
CNBG_0856
CNBG_0857
CNBG_0858
CNBG_0859
CNBG_0861
CNBG_0862
CNBG_0863
CNBG_0864
CNBG_0865
CNBG_0866
CNBG_0867
CNBG_0868
CNBG_0869
CNBG_0870
CNBG_0871
CNBG_0872
CNBG_0874
CNBG_0875
CNBG_0877
CNBG_0879
CNBG_0880
CNBG_0881
CNBG_0882
CNBG_0883
CNBG_0884
CNBG_0885
CNBG_0886
CNBG_0887
CNBG_0888
CNBG_0889
CNBG_0890
CNBG_0891
CNBG_0892
CNBG_0893
CNBG_0894
CNBG_0895
CNBG_0896
CNBG_0897
CNBG_0898
CNBG_0899
CNBG_0900
CNBG_0901
CNBG_0902
CNBG_0903
CNBG_0904
CNBG_0905
CNBG_0906
CNBG_0907
CNBG_0908
CNBG_0909
CNBG_0910
CNBG_0911
CNBG_0912
CNBG_0913
CNBG_0914
CNBG_0915
CNBG_0917
CNBG_0918
CNBG_0919
CNBG_0920
CNBG_0922
CNBG_0923
CNBG_0924
CNBG_0925
CNBG_0926
CNBG_0927
CNBG_0928
CNBG_0929
CNBG_0930
CNBG_0931
CNBG_0932
CNBG_0933
CNBG_0934
CNBG_0935
CNBG_0936
CNBG_0937
CNBG_0938
CNBG_0939
CNBG_0940
CNBG_0941
CNBG_0942
CNBG_0943
CNBG_0944
CNBG_0945
CNBG_0946
CNBG_0947
CNBG_0948
CNBG_0949
CNBG_0950
CNBG_0951
CNBG_0952
CNBG_0953
CNBG_0954
CNBG_0955
CNBG_0956
CNBG_0957
CNBG_0958
CNBG_0959
CNBG_0960
CNBG_0961
CNBG_0963
CNBG_0964
CNBG_0965
CNBG_0966
CNBG_0967
CNBG_0968
CNBG_0969
CNBG_0970
CNBG_0971
CNBG_0972
CNBG_0973
CNBG_0974
CNBG_0975
CNBG_0976
CNBG_0977
CNBG_0978
CNBG_0979
CNBG_0980
CNBG_0981
CNBG_0982
CNBG_0983
CNBG_0984
CNBG_0985
CNBG_0986
CNBG_0987
CNBG_0988
CNBG_0989
CNBG_0990
CNBG_0991
CNBG_0992
CNBG_0994
CNBG_0995
CNBG_0996
CNBG_0997
CNBG_0998
CNBG_0999
CNBG_1000
CNBG_1001
CNBG_1002
CNBG_1004
CNBG_1005
CNBG_1006
CNBG_1007
CNBG_1008
CNBG_1009
CNBG_1010
CNBG_1011
CNBG_1012
CNBG_1013
CNBG_1014
CNBG_1015
CNBG_1016
CNBG_1017
CNBG_1018
CNBG_1019
CNBG_1020
CNBG_1021
CNBG_1022
CNBG_1023
CNBG_1024
CNBG_1026
CNBG_1027
CNBG_1028
CNBG_1029
CNBG_1030
CNBG_1031
CNBG_1032
CNBG_1033
CNBG_1034
CNBG_1035
CNBG_1036
CNBG_1038
CNBG_1039
CNBG_1040
CNBG_1041
CNBG_1042
CNBG_1043
CNBG_1044
CNBG_1045
CNBG_1046
CNBG_1047
CNBG_1048
CNBG_1049
CNBG_1050
CNBG_1051
CNBG_1052
CNBG_1053
CNBG_1054
CNBG_1055
CNBG_1056
CNBG_1057
CNBG_1058
CNBG_1059
CNBG_1061
CNBG_1062
CNBG_1063
CNBG_1065
CNBG_1066
CNBG_1067
CNBG_1068
CNBG_1069
CNBG_1070
CNBG_1071
CNBG_1072
CNBG_1073
CNBG_1074
CNBG_1075
CNBG_1076
CNBG_1077
CNBG_1078
CNBG_1079
CNBG_1080
CNBG_1081
CNBG_1082
CNBG_1083
CNBG_1084
CNBG_1085
CNBG_1086
CNBG_1087
CNBG_1088
CNBG_1089
CNBG_1090
CNBG_1091
CNBG_1092
CNBG_1093
CNBG_1094
CNBG_1095
CNBG_1096
CNBG_1097
CNBG_1098
CNBG_1099
CNBG_1100
CNBG_1101
CNBG_1102
CNBG_1103
CNBG_1104
CNBG_1105
CNBG_1106
CNBG_1107
CNBG_1108
CNBG_1109
CNBG_1110
CNBG_1111
CNBG_1112
CNBG_1114
CNBG_1115
CNBG_1116
CNBG_1117
CNBG_1118
CNBG_1119
CNBG_1120
CNBG_1121
CNBG_1122
CNBG_1123
CNBG_1124
CNBG_1125
CNBG_1126
CNBG_1127
CNBG_1128
CNBG_1129
CNBG_1130
CNBG_1131
CNBG_1132
CNBG_1133
CNBG_1134
CNBG_1135
CNBG_1137
CNBG_1138
CNBG_1139
CNBG_1140
CNBG_1141
CNBG_1142
CNBG_1143
CNBG_1144
CNBG_1145
CNBG_1146
CNBG_1147
CNBG_1148
CNBG_1149
CNBG_1150
CNBG_1151
CNBG_1152
CNBG_1154
CNBG_1155
CNBG_1156
CNBG_1157
CNBG_1158
CNBG_1160
CNBG_1161
CNBG_1162
CNBG_1163
CNBG_1164
CNBG_1165
CNBG_1167
CNBG_1168
CNBG_1169
CNBG_1170
CNBG_1171
CNBG_1172
CNBG_1173
CNBG_1174
CNBG_1175
CNBG_1176
CNBG_1177
CNBG_1178
CNBG_1179
CNBG_1180
CNBG_1181
CNBG_1182
CNBG_1183
CNBG_1184
CNBG_1185
CNBG_1186
CNBG_1187
CNBG_1188
CNBG_1189
CNBG_1190
CNBG_1191
CNBG_1192
CNBG_1193
CNBG_1194
CNBG_1195
CNBG_1196
CNBG_1197
CNBG_1198
CNBG_1199
CNBG_1200
CNBG_1202
CNBG_1203
CNBG_1204
CNBG_1205
CNBG_1206
CNBG_1207
CNBG_1208
CNBG_1209
CNBG_1210
CNBG_1211
CNBG_1212
CNBG_1213
CNBG_1214
CNBG_1215
CNBG_1216
CNBG_1217
CNBG_1218
CNBG_1219
CNBG_1220
CNBG_1221
CNBG_1222
CNBG_1223
CNBG_1224
CNBG_1225
CNBG_1226
CNBG_1227
CNBG_1228
CNBG_1229
CNBG_1231
CNBG_1232
CNBG_1233
CNBG_1234
CNBG_1235
CNBG_1236
CNBG_1237
CNBG_1238
CNBG_1239
CNBG_1240
CNBG_1241
CNBG_1242
CNBG_1243
CNBG_1244
CNBG_1246
CNBG_1247
CNBG_1248
CNBG_1249
CNBG_1250
CNBG_1251
CNBG_1252
CNBG_1253
CNBG_1254
CNBG_1255
CNBG_1256
CNBG_1257
CNBG_1258
CNBG_1259
CNBG_1260
CNBG_1261
CNBG_1262
CNBG_1263
CNBG_1264
CNBG_1265
CNBG_1266
CNBG_1267
CNBG_1268
CNBG_1269
CNBG_1270
CNBG_1271
CNBG_1272
CNBG_1273
CNBG_1274
CNBG_1275
CNBG_1276
CNBG_1277
CNBG_1278
CNBG_1280
CNBG_1281
CNBG_1282
CNBG_1283
CNBG_1284
CNBG_1285
CNBG_1286
CNBG_1287
CNBG_1288
CNBG_1289
CNBG_1290
CNBG_1291
CNBG_1292
CNBG_1293
CNBG_1294
CNBG_1295
CNBG_1296
CNBG_1297
CNBG_1298
CNBG_1299
CNBG_1300
CNBG_1301
CNBG_1302
CNBG_1303
CNBG_1304
CNBG_1305
CNBG_1306
CNBG_1307
CNBG_1309
CNBG_1310
CNBG_1311
CNBG_1312
CNBG_1313
CNBG_1314
CNBG_1315
CNBG_1316
CNBG_1317
CNBG_1318
CNBG_1319
CNBG_1321
CNBG_1322
CNBG_1323
CNBG_1325
CNBG_1327
CNBG_1328
CNBG_1329
CNBG_1330
CNBG_1331
CNBG_1332
CNBG_1333
CNBG_1334
CNBG_1335
CNBG_1336
CNBG_1337
CNBG_1338
CNBG_1339
CNBG_1340
CNBG_1341
CNBG_1342
CNBG_1343
CNBG_1344
CNBG_1345
CNBG_1346
CNBG_1347
CNBG_1348
CNBG_1349
CNBG_1350
CNBG_1351
CNBG_1352
CNBG_1353
CNBG_1354
CNBG_1355
CNBG_1356
CNBG_1357
CNBG_1358
CNBG_1359
CNBG_1360
CNBG_1361
CNBG_1362
CNBG_1363
CNBG_1364
CNBG_1365
CNBG_1366
CNBG_1367
CNBG_1368
CNBG_1370
CNBG_1371
CNBG_1372
CNBG_1373
CNBG_1374
CNBG_1375
CNBG_1376
CNBG_1377
CNBG_1378
CNBG_1379
CNBG_1380
CNBG_1381
CNBG_1382
CNBG_1383
CNBG_1384
CNBG_1385
CNBG_1386
CNBG_1387
CNBG_1388
CNBG_1389
CNBG_1390
CNBG_1391
CNBG_1392
CNBG_1393
CNBG_1394
CNBG_1395
CNBG_1396
CNBG_1397
CNBG_1398
CNBG_1399
CNBG_1400
CNBG_1401
CNBG_1402
CNBG_1403
CNBG_1404
CNBG_1405
CNBG_1406
CNBG_1407
CNBG_1408
CNBG_1409
CNBG_1410
CNBG_1411
CNBG_1413
CNBG_1414
CNBG_1416
CNBG_1417
CNBG_1418
CNBG_1419
CNBG_1420
CNBG_1421
CNBG_1422
CNBG_1423
CNBG_1424
CNBG_1425
CNBG_1426
CNBG_1427
CNBG_1428
CNBG_1429
CNBG_1431
CNBG_1432
CNBG_1433
CNBG_1434
CNBG_1435
CNBG_1436
CNBG_1437
CNBG_1438
CNBG_1439
CNBG_1440
CNBG_1441
CNBG_1442
CNBG_1443
CNBG_1444
CNBG_1445
CNBG_1446
CNBG_1447
CNBG_1448
CNBG_1449
CNBG_1450
CNBG_1451
CNBG_1452
CNBG_1453
CNBG_1454
CNBG_1455
CNBG_1456
CNBG_1457
CNBG_1458
CNBG_1459
CNBG_1460
CNBG_1461
CNBG_1462
CNBG_1463
CNBG_1464
CNBG_1465
CNBG_1466
CNBG_1467
CNBG_1468
CNBG_1469
CNBG_1470
CNBG_1471
CNBG_1472
CNBG_1473
CNBG_1474
CNBG_1475
CNBG_1476
CNBG_1477
CNBG_1478
CNBG_1480
CNBG_1481
CNBG_1482
CNBG_1483
CNBG_1484
CNBG_1485
CNBG_1486
CNBG_1487
CNBG_1488
CNBG_1489
CNBG_1490
CNBG_1491
CNBG_1492
CNBG_1493
CNBG_1494
CNBG_1495
CNBG_1496
CNBG_1497
CNBG_1498
CNBG_1499
CNBG_1500
CNBG_1501
CNBG_1503
CNBG_1505
CNBG_1506
CNBG_1508
CNBG_1509
CNBG_1510
CNBG_1512
CNBG_1513
CNBG_1514
CNBG_1515
CNBG_1516
CNBG_1517
CNBG_1518
CNBG_1519
CNBG_1520
CNBG_1521
CNBG_1522
CNBG_1523
CNBG_1524
CNBG_1525
CNBG_1526
CNBG_1527
CNBG_1528
CNBG_1529
CNBG_1530
CNBG_1531
CNBG_1532
CNBG_1533
CNBG_1534
CNBG_1535
CNBG_1536
CNBG_1537
CNBG_1540
CNBG_1541
CNBG_1542
CNBG_1543
CNBG_1544
CNBG_1545
CNBG_1546
CNBG_1547
CNBG_1548
CNBG_1549
CNBG_1550
CNBG_1551
CNBG_1553
CNBG_1554
CNBG_1555
CNBG_1556
CNBG_1558
CNBG_1559
CNBG_1560
CNBG_1563
CNBG_1564
CNBG_1565
CNBG_1566
CNBG_1568
CNBG_1569
CNBG_1570
CNBG_1571
CNBG_1572
CNBG_1573
CNBG_1574
CNBG_1575
CNBG_1576
CNBG_1577
CNBG_1579
CNBG_1580
CNBG_1581
CNBG_1582
CNBG_1583
CNBG_1584
CNBG_1585
CNBG_1586
CNBG_1587
CNBG_1588
CNBG_1589
CNBG_1590
CNBG_1591
CNBG_1592
CNBG_1594
CNBG_1595
CNBG_1596
CNBG_1598
CNBG_1599
CNBG_1600
CNBG_1601
CNBG_1602
CNBG_1603
CNBG_1605
CNBG_1606
CNBG_1607
CNBG_1608
CNBG_1609
CNBG_1610
CNBG_1612
CNBG_1613
CNBG_1614
CNBG_1615
CNBG_1616
CNBG_1617
CNBG_1618
CNBG_1619
CNBG_1620
CNBG_1621
CNBG_1622
CNBG_1623
CNBG_1624
CNBG_1625
CNBG_1626
CNBG_1628
CNBG_1630
CNBG_1631
CNBG_1632
CNBG_1633
CNBG_1635
CNBG_1636
CNBG_1637
CNBG_1638
CNBG_1639
CNBG_1640
CNBG_1641
CNBG_1642
CNBG_1643
CNBG_1644
CNBG_1645
CNBG_1646
CNBG_1647
CNBG_1648
CNBG_1649
CNBG_1650
CNBG_1651
CNBG_1652
CNBG_1653
CNBG_1654
CNBG_1655
CNBG_1656
CNBG_1657
CNBG_1658
CNBG_1659
CNBG_1660
CNBG_1661
CNBG_1662
CNBG_1663
CNBG_1664
CNBG_1665
CNBG_1667
CNBG_1668
CNBG_1670
CNBG_1672
CNBG_1673
CNBG_1674
CNBG_1675
CNBG_1676
CNBG_1677
CNBG_1678
CNBG_1679
CNBG_1680
CNBG_1681
CNBG_1683
CNBG_1684
CNBG_1685
CNBG_1686
CNBG_1687
CNBG_1688
CNBG_1689
CNBG_1690
CNBG_1691
CNBG_1692
CNBG_1693
CNBG_1694
CNBG_1695
CNBG_1696
CNBG_1697
CNBG_1698
CNBG_1699
CNBG_1700
CNBG_1701
CNBG_1702
CNBG_1703
CNBG_1704
CNBG_1705
CNBG_1706
CNBG_1707
CNBG_1708
CNBG_1709
CNBG_1710
CNBG_1711
CNBG_1712
CNBG_1713
CNBG_1714
CNBG_1715
CNBG_1716
CNBG_1717
CNBG_1718
CNBG_1719
CNBG_1720
CNBG_1721
CNBG_1722
CNBG_1723
CNBG_1724
CNBG_1725
CNBG_1726
CNBG_1727
CNBG_1728
CNBG_1729
CNBG_1730
CNBG_1731
CNBG_1732
CNBG_1733
CNBG_1734
CNBG_1735
CNBG_1736
CNBG_1737
CNBG_1738
CNBG_1739
CNBG_1740
CNBG_1741
CNBG_1742
CNBG_1743
CNBG_1744
CNBG_1745
CNBG_1746
CNBG_1747
CNBG_1749
CNBG_1750
CNBG_1751
CNBG_1752
CNBG_1753
CNBG_1754
CNBG_1756
CNBG_1757
CNBG_1758
CNBG_1759
CNBG_1760
CNBG_1761
CNBG_1762
CNBG_1763
CNBG_1765
CNBG_1766
CNBG_1767
CNBG_1768
CNBG_1769
CNBG_1771
CNBG_1772
CNBG_1774
CNBG_1775
CNBG_1776
CNBG_1777
CNBG_1778
CNBG_1779
CNBG_1780
CNBG_1781
CNBG_1782
CNBG_1783
CNBG_1785
CNBG_1786
CNBG_1787
CNBG_1788
CNBG_1789
CNBG_1790
CNBG_1791
CNBG_1792
CNBG_1793
CNBG_1794
CNBG_1795
CNBG_1796
CNBG_1797
CNBG_1798
CNBG_1799
CNBG_1800
CNBG_1801
CNBG_1802
CNBG_1803
CNBG_1804
CNBG_1805
CNBG_1806
CNBG_1807
CNBG_1808
CNBG_1809
CNBG_1810
CNBG_1811
CNBG_1812
CNBG_1813
CNBG_1814
CNBG_1816
CNBG_1817
CNBG_1818
CNBG_1819
CNBG_1820
CNBG_1821
CNBG_1822
CNBG_1823
CNBG_1824
CNBG_1825
CNBG_1826
CNBG_1827
CNBG_1828
CNBG_1829
CNBG_1830
CNBG_1831
CNBG_1832
CNBG_1833
CNBG_1834
CNBG_1835
CNBG_1836
CNBG_1838
CNBG_1839
CNBG_1840
CNBG_1841
CNBG_1842
CNBG_1843
CNBG_1844
CNBG_1845
CNBG_1846
CNBG_1847
CNBG_1848
CNBG_1849
CNBG_1850
CNBG_1851
CNBG_1852
CNBG_1853
CNBG_1854
CNBG_1855
CNBG_1856
CNBG_1857
CNBG_1858
CNBG_1859
CNBG_1860
CNBG_1861
CNBG_1862
CNBG_1863
CNBG_1864
CNBG_1865
CNBG_1866
CNBG_1868
CNBG_1869
CNBG_1870
CNBG_1871
CNBG_1872
CNBG_1873
CNBG_1874
CNBG_1875
CNBG_1876
CNBG_1877
CNBG_1878
CNBG_1879
CNBG_1880
CNBG_1881
CNBG_1883
CNBG_1884
CNBG_1885
CNBG_1886
CNBG_1887
CNBG_1888
CNBG_1889
CNBG_1890
CNBG_1891
CNBG_1892
CNBG_1893
CNBG_1894
CNBG_1895
CNBG_1896
CNBG_1897
CNBG_1898
CNBG_1899
CNBG_1900
CNBG_1901
CNBG_1902
CNBG_1903
CNBG_1904
CNBG_1905
CNBG_1906
CNBG_1907
CNBG_1909
CNBG_1910
CNBG_1911
CNBG_1912
CNBG_1913
CNBG_1914
CNBG_1915
CNBG_1916
CNBG_1918
CNBG_1919
CNBG_1920
CNBG_1921
CNBG_1922
CNBG_1924
CNBG_1925
CNBG_1926
CNBG_1927
CNBG_1928
CNBG_1929
CNBG_1930
CNBG_1931
CNBG_1932
CNBG_1933
CNBG_1934
CNBG_1935
CNBG_1936
CNBG_1937
CNBG_1938
CNBG_1939
CNBG_1940
CNBG_1941
CNBG_1942
CNBG_1943
CNBG_1944
CNBG_1945
CNBG_1946
CNBG_1947
CNBG_1948
CNBG_1949
CNBG_1950
CNBG_1951
CNBG_1952
CNBG_1953
CNBG_1955
CNBG_1956
CNBG_1957
CNBG_1958
CNBG_1959
CNBG_1960
CNBG_1961
CNBG_1962
CNBG_1963
CNBG_1964
CNBG_1965
CNBG_1966
CNBG_1967
CNBG_1968
CNBG_1969
CNBG_1970
CNBG_1971
CNBG_1972
CNBG_1973
CNBG_1974
CNBG_1975
CNBG_1976
CNBG_1977
CNBG_1979
CNBG_1980
CNBG_1981
CNBG_1982
CNBG_1983
CNBG_1984
CNBG_1986
CNBG_1987
CNBG_1988
CNBG_1990
CNBG_1991
CNBG_1992
CNBG_1993
CNBG_1994
CNBG_1995
CNBG_1996
CNBG_1997
CNBG_1998
CNBG_1999
CNBG_2000
CNBG_2001
CNBG_2002
CNBG_2003
CNBG_2004
CNBG_2005
CNBG_2006
CNBG_2007
CNBG_2008
CNBG_2009
CNBG_2010
CNBG_2011
CNBG_2012
CNBG_2013
CNBG_2014
CNBG_2015
CNBG_2016
CNBG_2017
CNBG_2018
CNBG_2019
CNBG_2020
CNBG_2021
CNBG_2022
CNBG_2023
CNBG_2025
CNBG_2026
CNBG_2027
CNBG_2028
CNBG_2029
CNBG_2030
CNBG_2031
CNBG_2032
CNBG_2033
CNBG_2034
CNBG_2036
CNBG_2037
CNBG_2038
CNBG_2039
CNBG_2040
CNBG_2041
CNBG_2042
CNBG_2043
CNBG_2044
CNBG_2045
CNBG_2046
CNBG_2047
CNBG_2048
CNBG_2049
CNBG_2051
CNBG_2052
CNBG_2053
CNBG_2054
CNBG_2056
CNBG_2057
CNBG_2058
CNBG_2059
CNBG_2060
CNBG_2061
CNBG_2062
CNBG_2063
CNBG_2064
CNBG_2065
CNBG_2066
CNBG_2067
CNBG_2068
CNBG_2069
CNBG_2070
CNBG_2071
CNBG_2072
CNBG_2073
CNBG_2074
CNBG_2075
CNBG_2076
CNBG_2077
CNBG_2078
CNBG_2079
CNBG_2080
CNBG_2081
CNBG_2082
CNBG_2083
CNBG_2084
CNBG_2085
CNBG_2086
CNBG_2087
CNBG_2088
CNBG_2089
CNBG_2090
CNBG_2091
CNBG_2092
CNBG_2093
CNBG_2094
CNBG_2095
CNBG_2096
CNBG_2097
CNBG_2098
CNBG_2099
CNBG_2100
CNBG_2101
CNBG_2102
CNBG_2103
CNBG_2104
CNBG_2105
CNBG_2106
CNBG_2107
CNBG_2108
CNBG_2109
CNBG_2110
CNBG_2112
CNBG_2113
CNBG_2114
CNBG_2115
CNBG_2116
CNBG_2117
[truncated: 4,406 more rows]
[truncated: 1 more columns]

## Sheet: ncRNA_genes
ncRNAs
CNBG_3012
CNBG_5793
CNBG_5925
CNBG_5928
CNBG_6026
CNBG_9126
CNBG_12000	novel ncRNA gene
CNBG_12001	novel ncRNA gene
CNBG_12002	novel ncRNA gene
CNBG_12003	novel ncRNA gene
CNBG_12004	novel ncRNA gene
CNBG_12005	novel ncRNA gene
CNBG_12006	novel ncRNA gene
CNBG_12007	novel ncRNA gene
CNBG_12008	novel ncRNA gene
CNBG_12009	novel ncRNA gene
CNBG_12011	novel ncRNA gene
CNBG_12012	novel ncRNA gene
CNBG_12013	novel ncRNA gene
CNBG_12014	novel ncRNA gene
CNBG_12015	novel ncRNA gene
CNBG_12016	novel ncRNA gene
CNBG_12017	novel ncRNA gene
CNBG_12018	novel ncRNA gene
CNBG_12019	novel ncRNA gene
CNBG_12020	novel ncRNA gene
CNBG_12021	novel ncRNA gene
CNBG_12022	novel ncRNA gene
CNBG_12023	novel ncRNA gene
CNBG_12024	novel ncRNA gene
CNBG_12025	novel ncRNA gene
CNBG_12026	novel ncRNA gene
CNBG_12027	novel ncRNA gene
CNBG_12028	novel ncRNA gene
CNBG_12029	novel ncRNA gene
CNBG_12030	novel ncRNA gene
CNBG_12031	novel ncRNA gene
CNBG_12032	novel ncRNA gene
CNBG_12033	novel ncRNA gene
CNBG_12034	novel ncRNA gene
CNBG_12035	novel ncRNA gene
CNBG_12036	novel ncRNA gene
CNBG_12037	novel ncRNA gene
CNBG_12038	novel ncRNA gene
CNBG_12039	novel ncRNA gene
CNBG_12040	novel ncRNA gene
CNBG_12041	novel ncRNA gene
CNBG_12042	novel ncRNA gene
CNBG_12043	novel ncRNA gene
CNBG_12044	novel ncRNA gene
CNBG_12045	novel ncRNA gene
CNBG_12046	novel ncRNA gene
CNBG_12047	novel ncRNA gene
CNBG_12048	novel ncRNA gene
CNBG_12049	novel ncRNA gene

## Sheet: pseudogenes_transposons
Pseudogenes (Transposons)
CNBG_13001	Transposon Tcn4
CNBG_13002	Transposon Tcn4
CNBG_13003	Transposon Tcn4
CNBG_13004	Transposon Tcn4
CNBG_13005	Transposon Tcn4
CNBG_13006	Transposon Tcn4
CNBG_13007	Transposon Tcn4
CNBG_13008	Transposon Tcn6
CNBG_13009	Transposon Tcn6
CNBG_13020	Transposon Tcn4
CNBG_13021	Transposon Tcn4
CNBG_13022	Transposon Tcn2
CNBG_13023	Transposon Tcn3
CNBG_13024	Transposon Tcn6
CNBG_13025	Transposon Tcn6
CNBG_13026	Transposon Tcn6
CNBG_13027	Transposon Tcn6
CNBG_13028	Transposon Tcn1
CNBG_13029	Transposon Tcn3
CNBG_13030	Transposon Tcn6
CNBG_13031	Transposon Tcn6
CNBG_13032	Transposon Tcn4
CNBG_13033	Transposon Tcn4
CNBG_13034	Transposon Tcn4
CNBG_13035	Transposon Tcn6
CNBG_13050	Transposon Tcn6
CNBG_13051	Transposon Tcn6
CNBG_13052	Transposon Tcn2
CNBG_13053	Transposon Tcn6
CNBG_13054	Transposon Tcn4
CNBG_13055	Transposon Tcn6
CNBG_13056	Transposon Tcn4
CNBG_13057	Transposon Tcn4
CNBG_13058	Transposon Tcn6
CNBG_13059	Transposon Tcn6
CNBG_13060	Transposon Tcn6
CNBG_13061	Transposon Tcn4
CNBG_13062	Transposon Tcn6
CNBG_13063	Transposon Tcn6
CNBG_13064	Transposon Tcn6
CNBG_13065	Transposon Tcn2
CNBG_13066	Transposon Tcn4
CNBG_13067	Transposon Tcn3
CNBG_13068	Transposon Tcn6
CNBG_13069	Transposon Tcn6
CNBG_13080	Transposon Tcn4
CNBG_13081	Transposon Tcn3
CNBG_13082	Transposon Tcn6
CNBG_13083	Transposon Tcn3
CNBG_13084	Transposon Tcn6
CNBG_13085	Transposon Tcn6
CNBG_13086	Transposon Tcn6
CNBG_13087	Transposon Tcn3
CNBG_13088	Transposon Tcn6
CNBG_13089	Transposon Tcn6
CNBG_13090	Transposon Tcn6
CNBG_13091	Transposon Tcn4
CNBG_13092	Transposon Tcn6
CNBG_13093	Transposon Tcn4
CNBG_13094	Transposon Tcn6
CNBG_13095	Transposon Tcn6
CNBG_13096	Transposon Tcn4
CNBG_13097	Transposon Tcn6
CNBG_13098	Transposon Tcn4
CNBG_13099	Transposon Tcn4

## Sheet: tRNA_genes
tRNAs
CNBG_00005	tRNA-Pro	TGG
CNBG_00006	tRNA-Asn	GTT
CNBG_00008	tRNA-Met	CAT
CNBG_00009	tRNA-Thr	TGT
CNBG_00010	tRNA-Gln	TTG
CNBG_00011	tRNA-Lys	CTT
CNBG_00012	tRNA-Trp	CCA
CNBG_00019	tRNA-Arg	TCG
CNBG_00020	tRNA-Gly	TCC
CNBG_00026	tRNA-Ile	GAT
CNBG_00028	tRNA-Ala	TGC
CNBG_00029	tRNA-Phe	GAA
CNBG_00030	tRNA-His	GTG
CNBG_00031	tRNA-Met	CAT
CNBG_00033	tRNA-Ser	TGA
CNBG_00035	tRNA-Tyr	GTA
CNBG_9017	tRNA-Pro	CGG
CNBG_9022	tRNA-Ala	AGC
CNBG_9023	tRNA-Ala	AGC
CNBG_9024	tRNA-Ala	AGC
CNBG_9032	tRNA-Ser	AGA
CNBG_9033	tRNA-Ser	AGA
CNBG_9034	tRNA-Ser	AGA
CNBG_9035	tRNA-Ser	AGA
CNBG_9036	tRNA-Thr	TGT
CNBG_9047	tRNA-Lys	CTT
CNBG_9059	tRNA-Tyr	GTA
CNBG_9060	tRNA-Tyr	GTA
CNBG_9067	tRNA-Asn	GTT
CNBG_9068	tRNA-Gly	GCC
CNBG_9074	tRNA-Asn	GTT
CNBG_9076	tRNA-Glu	TTC
CNBG_9086	tRNA-Glu	CTC
CNBG_9087	tRNA-Glu	CTC
CNBG_9088	tRNA-Arg	TCG
CNBG_9089	tRNA-Glu	CTC
CNBG_9092	tRNA-Arg	TCG
CNBG_9096	tRNA-Glu	CTC
CNBG_9099	tRNA-Val	CAC
CNBG_9109	tRNA-Val	AAC
CNBG_9113	tRNA-Ala	TGC
CNBG_9122	tRNA-Ile	TAT
CNBG_9124	tRNA-Gly	GCC
CNBG_9131	tRNA-Leu	AAG
CNBG_9132	tRNA-Leu	AAG
CNBG_9133	tRNA-Leu	AAG
CNBG_9136	tRNA-Gly	TCC
CNBG_9151	tRNA-Glu	CTC
CNBG_9152	tRNA-Glu	CTC
CNBG_9162	tRNA-Leu	AAG
CNBG_9163	tRNA-Arg	CCT
CNBG_9176	tRNA-Glu	CTC
CNBG_9179	tRNA-Gly	GCC
CNBG_9186	tRNA-Met	CAT
CNBG_9188	tRNA-Met	CAT
CNBG_9189	tRNA-Thr	AGT
CNBG_9190	tRNA-Ala	AGC
CNBG_9191	tRNA-Gly	GCC
CNBG_9194	tRNA-Gly	GCC
CNBG_9195	tRNA-Lys	TTT
CNBG_9196	tRNA-Gly	TCC
CNBG_9197	tRNA-Lys	CTT
CNBG_9200	tRNA-Thr	AGT
CNBG_9201	tRNA-Arg	TCG
CNBG_9202	tRNA-Arg	TCG
CNBG_9206	tRNA-Arg	ACG
CNBG_9207	tRNA-Gln	CTG
CNBG_9208	tRNA-Gln	CTG
CNBG_9217	tRNA-Thr	AGT
CNBG_9223	tRNA-Ser	GCT
CNBG_9234	tRNA-His	GTG
CNBG_9237	tRNA-Leu	CAA
CNBG_9238	tRNA-Arg	TCT
CNBG_9240	tRNA-Ser	AGA
CNBG_9243	tRNA-Pro	AGG
CNBG_9244	tRNA-Pro	AGG
CNBG_9247	tRNA-Ser	AGA
CNBG_9250	tRNA-Ala	AGC
CNBG_9252	tRNA-Ala	AGC
CNBG_9254	tRNA-Ile	AAT
CNBG_9255	tRNA-Ile	AAT
CNBG_9256	tRNA-Ile	AAT
CNBG_9259	tRNA-Ile	AAT
CNBG_9260	tRNA-Gly	GCC
CNBG_9261	tRNA-Ile	AAT
CNBG_9262	tRNA-Pro	AGG
CNBG_9277	tRNA-Thr	AGT
CNBG_9280	tRNA-Thr	AGT
CNBG_9281	tRNA-Leu	CAA
CNBG_9285	tRNA-Arg	TCG
CNBG_9294	tRNA-Leu	AAG
CNBG_9296	tRNA-iMet	CAT
CNBG_9298	tRNA-Asn	GTT
CNBG_9301	tRNA-Gln	TTG
CNBG_9307	tRNA-Gly	TCC
CNBG_9325	tRNA-Leu	AAG
CNBG_9334	tRNA-Ala	AGC
CNBG_9339	tRNA-Gly	CCC
CNBG_9340	tRNA-Glu	TTC
CNBG_9384	tRNA-Leu	CAG
CNBG_9401	tRNA-Phe	GAA
CNBG_9402	tRNA-Ala	CGC
CNBG_9407	tRNA-Ala	CGC
CNBG_9408	tRNA-Met	CAT
CNBG_9409	tRNA-Trp	CCA
CNBG_9417	tRNA-Lys	CTT
CNBG_9430	tRNA-iMet	CAT
CNBG_9438	tRNA-Gly	GCC
CNBG_9439	tRNA-Gln	TTG
CNBG_9468	tRNA-Val	AAC
CNBG_9469	tRNA-Leu	CAA
CNBG_9483	tRNA-Pro	AGG
CNBG_9489	tRNA-Ile	AAT
CNBG_9490	tRNA-Pro	AGG
CNBG_9493	tRNA-Val	AAC
CNBG_9495	tRNA-Val	AAC
CNBG_9496	tRNA-Val	AAC
CNBG_9497	tRNA-Val	AAC
CNBG_9500	tRNA-Val	AAC
CNBG_9501	tRNA-Trp	CCA
CNBG_9510	tRNA-Glu	TTC
CNBG_9514	tRNA-Lys	CTT
CNBG_9538	tRNA-Tyr	GTA
CNBG_9539	tRNA-Lys	CTT
CNBG_9550	tRNA-Cys	GCA
CNBG_9551	tRNA-Cys	GCA
CNBG_9554	tRNA-Asn	GTT
CNBG_9556	tRNA-Lys	CTT
CNBG_9562	tRNA-Gly	GCC
CNBG_9565	tRNA-Gly	GCC
CNBG_9573	tRNA-Pro	TGG
CNBG_9577	tRNA-Phe	GAA
CNBG_9595	tRNA-Glu	CTC
CNBG_9596	tRNA-Leu	TAA
CNBG_9601	tRNA-Ser	TGA
CNBG_9602	tRNA-Thr	CGT
CNBG_9606	tRNA-Arg	ACG
CNBG_9611	tRNA-Arg	CCG
CNBG_9615	tRNA-His	GTG
CNBG_9616	tRNA-Lys	CTT
CNBG_9617	tRNA-Gln	CTG
CNBG_9623	tRNA-Trp	CCA
CNBG_9625	tRNA-Pro	AGG
CNBG_9628	tRNA-Phe	GAA
CNBG_9630	tRNA-iMet	CAT
CNBG_9641	tRNA-Arg	CCT
CNBG_9642	tRNA-Arg	CCT
CNBG_9648	tRNA-Gly	CCC
CNBG_9649	tRNA-Arg	ACG
CNBG_9655	tRNA-Glu	CTC
CNBG_9656	tRNA-Glu	CTC
CNBG_9659	tRNA-Phe	GAA
CNBG_9660	tRNA-Phe	GAA
CNBG_9666	tRNA-His	GTG
CNBG_9676	tRNA-Cys	GCA
CNBG_11000	tRNA-Asp	GTC	novel tRNA gene
CNBG_11001	tRNA-Asp	GTC	novel tRNA gene
CNBG_11002	tRNA-Tyr	GTA	novel tRNA gene
CNBG_11004	tRNA-Val	CAC	novel tRNA gene
CNBG_11009	tRNA-Tyr	GTA	novel tRNA gene
CNBG_11012	tRNA-Gly	TCC	novel tRNA gene
